# Supplementary material for: Multiple asynchronous recurrence as a predictive factor for refractoriness against locoregional and surgical therapy in patients with intermediate-stage hepatocellular carcinoma
Source: PubMed Central journal article supplement (PMC11091100; doi:10.1038/s41598-024-61611-4), 2024-05-13
Supplement: 41598_2024_61611_MOESM1_ESM.pdf [file 41598_2024_61611_MOESM1_ESM.pdf]

Supplementary Table 1. Bootstrap estimates for the multivariable models

| Variable                 | OR     | 95%CI |        | <i>p</i> value |
|--------------------------|--------|-------|--------|----------------|
|                          |        | lower | upper  |                |
| Child-Pugh score         | 1.849  | 1.234 | 2.771  | 0.003**        |
| Number of tumor          | 1.224  | 1.057 | 1.418  | 0.007**        |
| Infiltrative type, n (%) | 12.482 | 5.385 | 28.935 | <0.001***      |
| Recurrence               | 2.550  | 1.146 | 5.675  | 0.022*         |

Statistics from 1000 bootstrapped samples were determined. Multivariate analysis of factors contributing to treatment refractoriness was performed. Asterisks indicate statistically significant differences of means ( $0.01 \leq * p < 0.05$ ;  $0.001 \leq ** p < 0.01$ ;  $*** p < 0.001$ ).

Supplementary Table 2. Characteristics of Tokyo, Saitama &amp; Chiba cohort

| Cohort                                   | Tokyo      | Saitama & Chiba | <i>p</i> value |
|------------------------------------------|------------|-----------------|----------------|
| Age (years), median (range)              | 74 (40-90) | 75 (55-85)      | 0.4488         |
| Male, n (%)                              | 111 (74.0) | 47 (79.7)       | 0.3850         |
| BMI (kg/m <sup>2</sup> ), mean ± SD      | 23.1 ± 0.4 | 23.5 ± 0.6      | 0.5969         |
| Underlying liver disease, n (%)          |            |                 | 0.0326*        |
| Alcohol                                  | 26 (17.3)  | 14 (17.0)       |                |
| HBV                                      | 23 (15.3)  | 2 (3.4)         |                |
| HCV                                      | 49 (32.7)  | 20 (33.9)       |                |
| NASH/NAFLD                               | 30 (20.0)  | 11 (18.6)       |                |
| PBC                                      | 2 (1.3)    | 1 (1.7)         |                |
| Cryptogenic                              | 20 (13.3)  | 11 (18.6)       |                |
| Child-Pugh class, n (%)                  |            |                 | 0.8555         |
| A                                        | 128 (85.3) | 51 (86.4)       |                |
| B                                        | 22 (14.7)  | 8 (13.6)        |                |
| mALBI grade, n (%)                       |            |                 | 0.7505         |
| 1                                        | 64 (42.7)  | 29 (49.2)       |                |
| 2a                                       | 37 (24.7)  | 8 (15.6)        |                |
| 2b                                       | 47 (31.3)  | 22 (37.3)       |                |
| 3                                        | 2 (1.3)    | 0 (0)           |                |
| Recurrence after curative therapy, n (%) | 79 (52.7)  | 24 (40.7)       | 0.1187         |
| Previous treatment, n (%)                |            |                 | 0.4253         |
| Liver resection                          | 17 (21.5)  | 9 (37.5)        |                |
| Ablation                                 | 35 (44.3)  | 7 (29.2)        |                |
| TACE                                     | 24 (30.4)  | 8 (33.3)        |                |
| SRT                                      | 3 (3.8)    | 0 (0)           |                |
| Radiological appearance, n (%)           |            |                 | 0.1968         |
| Nodular type                             | 63 (42.0)  | 31 (52.5)       |                |
| Infiltrative type                        | 87 (58.0)  | 28 (47.5)       |                |
| AFP (ng/dl) (%)                          |            |                 | 0.6858         |
| <200                                     | 125 (83.3) | 46 (78.0)       |                |
| ≥200                                     | 25 (16.7)  | 13 (22.0)       |                |
| DCP (mAU/ml), n (%)                      |            |                 | 0.3080         |
| <400                                     | 107 (71.3) | 35 (66.0)       |                |
| ≥400                                     | 43 (28.7)  | 18 (34.0)       |                |
| Number of tumor, n (%)                   |            |                 | 0.4590         |
| ≤3                                       | 66 (44.0)  | 27 (45.8)       |                |
| 4-6                                      | 64 (42.6)  | 25 (42.4)       |                |
| >7                                       | 20 (13.3)  | 7 (11.9)        |                |
| 1 (solitary large)                       | 34 (22.7)  | 10 (16.9)       |                |
| Largest tumor diameter, n (%)            |            |                 | 0.1298         |
| ≤3                                       | 74 (49.3)  | 24 (40.7)       |                |
| 3-6                                      | 50 (33.3)  | 21 (33.6)       |                |
| >6                                       | 26 (17.3)  | 14 (23.7)       |                |
| Up-to-7 criteria, n (%)                  |            |                 | 0.6826         |
| Within                                   | 86 (57.3)  | 26 (44.1)       |                |
| Beyond                                   | 64 (42.7)  | 33 (55.9)       |                |

BMI: body mass index, HBV: hepatitis B virus, HCV: hepatitis C virus, NASH: nonalcoholic steatohepatitis, NAFLD: nonalcoholic fatty liver disease, PBC: primary biliary cholangitis, TACE: transarterial chemoembolization, SRT: stereotactic radiotherapy, AFP: alpha-fetoprotein, DCP: des-γ-carboxy prothrombin.

(a)

| Variable                          | Tokyo cohort |             |                | Saitama & Chiba cohort |             |                |
|-----------------------------------|--------------|-------------|----------------|------------------------|-------------|----------------|
|                                   | Refractory   | Responder   | Univariate     | Refractory             | Responder   | Univariate     |
|                                   | (N=55)       | (N=95)      | <i>p</i> value | (N=17)                 | (N=42)      | <i>p</i> value |
| Child-Pugh score                  | 5.85 ± 0.12  | 5.48 ± 0.09 | 0.019*         | 5.65 ± 0.19            | 5.40 ± 0.12 | 0.280          |
| Number of tumor                   | 6.3 ± 0.6    | 3.3 ± 0.4   | <0.001***      | 5.1 ± 0.6              | 3.5 ± 0.4   | 0.023*         |
| Infiltrative type, n (%)          | 47(85.5)     | 39 (41.1)   | <0.001***      | 13(76.5)               | 15(35.7)    | 0.009**        |
| Recurrence after curative therapy | 37(67.3)     | 42(44.2)    | 0.007**        | 11(64.8)               | 14(33.3)    | 0.042*         |

(b)

Tokyo cohort

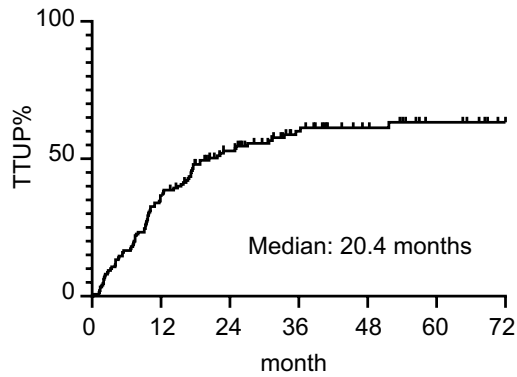

Saitama &amp; Chiba cohort

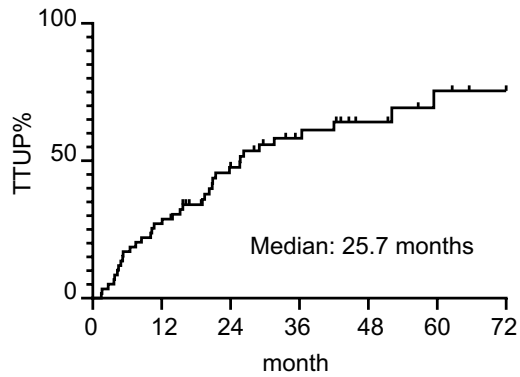

(c)

Tokyo cohort

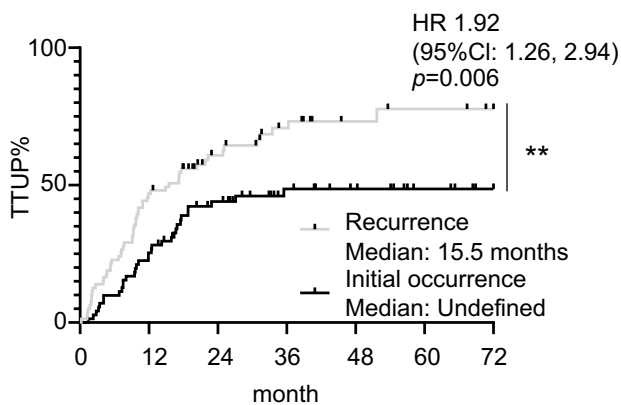

Saitama &amp; Chiba cohort

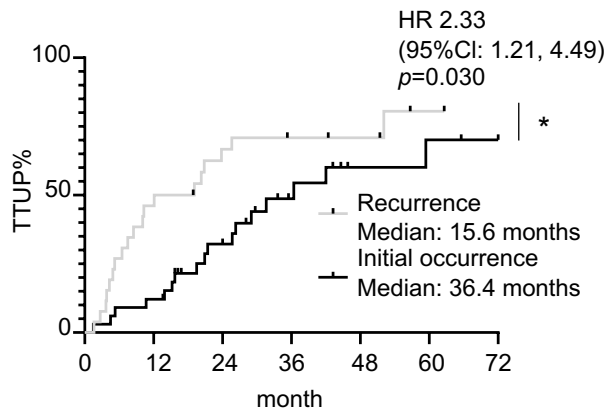

Supplementary Figure 1. Respective analysis by site of Tokyo cohort and Saitama & Chiba cohort (a) Univariate analysis of factor contributing to treatment refractoriness. Kaplan–Meier curves of the TTUP in (b) all patients, (c) patients who underwent locoregional therapies because of initial occurrence or consecutive recurrence. Asterisks indicate statistically significant differences of means ( $0.01 \leq * p < 0.05$ ;  $0.001 \leq ** p < 0.01$ ;  $*** p < 0.001$ ). TTUP: time to untreatable unTACEable progression.

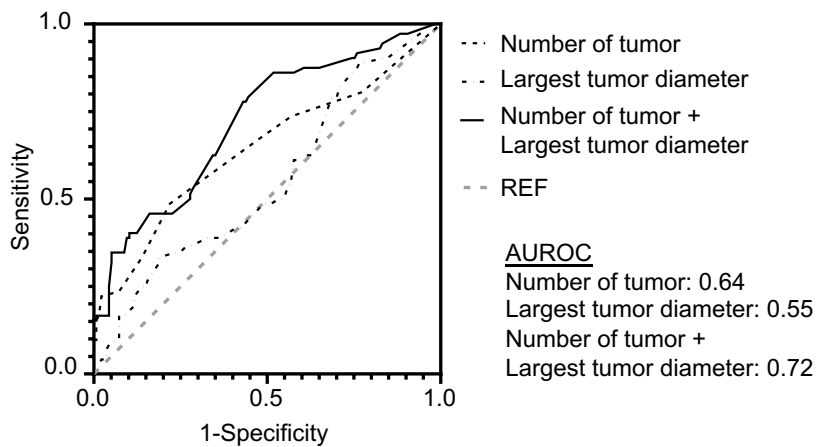

### Supplementary Figure 2. ROC analysis for predicting treatment refractoriness

Comparison of number of tumors, largest tumor diameter, and sum of the diameter of the largest tumor (in centimeter) and the number of tumors for predicting treatment refractoriness calculated by ROC analysis.

ROC: receiver operating characteristic.
